# Supplementary material for: Publication and related biases in health services research: a systematic review of empirical evidence
Source: Springer Nature journal article supplement (doi:10.1186/s12874-020-01010-1), 2020-06-01
Supplement: MOESM2 [file 18041998]

# Appendices

## Publication and related biases in health services research: a systematic review of empirical evidence

Authors: Abimbola A Ayorinde, Iestyn Williams, Russell Mannion, Fujian Song, Magdalena Skrybant, Richard J Lilford, Yen-Fu Chen

### Appendix 1 Search strategy for MEDLINE

- 1 \*Health Services Research/ or health service\$ research.mp. (37371)
- 2 service delivery.mp. (10383)
- 3 health system\$.mp. (37050)
- 4 healthcare system\$.mp. (15933)
- 5 Health Policy.mp. or \*Health Policy/ (69602)
- 6 ((health care or healthcare or hospital\$ or service\$) adj1 (administration or organi\$ation or management or structure or govern\* or financ\* or account\* or accredit\* or policy or efficiency)).mp. (75495)
- 7 exp Primary Health Care/ and (administration or organi\$ation or management or structure or govern\* or financ\* or account\* or accredit\* or policy or efficiency).mp. (42274)
- 8 exp Governing Board/ (7162)
- 9 Patient Safety.mp. or exp Patient Safety/ (29465)
- 10 exp Medical Errors/ (99972)
- 11 ((adverse event\$ or infection\$ or complication\$) adj1 prevent\*).mp. (16088)
- 12 Quality Improvement.mp. or exp Quality Improvement/ (34488)
- 13 exp Total Quality Management/ or \*Risk Management/ or change management.mp. (21623)
- 14 exp Organizational Culture/ (15289)
- 15 leadership.mp. or exp Leadership/ (51370)

- 16 exp Medical Records Systems, Computerized/ (32367)
- 17 exp Operations Research/ or operational research.mp. (28506)
- 18 exp "Appointments and Schedules"/ or waiting time.mp. (21419)
- 19 exp Triage/ or triage.mp. (17463)
- 20 ((integrat\* or pathway or continuity or access\* or model\*or transition) adj2 (care or service\$)).mp. (98373)
- 21 (exp Health Personnel/ or (staff or professional\$ or healthcare worker\$ or health care worker\$ or health worker\$ or workforce\$ or nurse\$ or doctor\$ or physician\$ or trainee\$ or consultant\$ or general practitioner\$ or surgeon\$ or dentist\$ or therapist\$ or pharmacist\$ or radiologist\$ or pathologist\$ or technician\$ or assistant\$).mp.) and (skill\$ or training or education or competence or morale or burnout or absenteeism or retention or deploy\* or workforce).mp. (431677)
- 22 exp Patient Education as Topic/ (79451)
- 23 exp Patient Satisfaction/ (75527)
- 24 \*Disease Management/ (15255)
- 25 (variation\$ adj2 (care or service\$ or outcome\$ or mortality or process\*)).mp. (3877)
- 26 ((organization\* or organisation\*) adj1 performance).mp. (911)
- 27 implementation science\$.mp. (867)
- 28 \*publication\$/ (3633)
- 29 bias\$.mp. or "Bias (Epidemiology)"/ (174661)
- 30 28 and 29 (63)
- 31 publication bias.mp. or exp Publication Bias/ (10831)
- 32 (bias\$ adj3 (publication\$ or disseminat\$ or language\$ or reporting or grey or gray or citation\$ or time delay or time lag or national or country or location or conference or abstract or duplicat\$ or multiple publication\$)).tw. (10242)
- 33 ((reference\$ or database\$ or index\$) adj2 bias\$).tw. (410)
- 34 (file adj1 drawer\$).tw. (58)
- 35 (time adj2 (completion or publication)).tw. (2889)

- 36 unpublished research.tw. (165)
- 37 (fail\$ adj2 publish\$.tw. (235)
- 38 (p-curve\$ or p-hack\*).tw. (150)
- 39 (data adj2 dredg\*).tw. (45)
- 40 phishing.tw. (27)
- 41 non-publication.tw. (73)
- 42 selective report\$.tw. (516)
- 43 selective non report\$.tw. (3)
- 44 selective non-report\$.tw. (3)
- 45 outcome report\$ bias.tw. (110)
- 46 1 or 2 or 3 or 4 or 5 or 6 or 7 or 8 or 9 or 10 or 11 or 12 or 13 or 14 or 15 or 16 or 17 or 18 or 19 or 20 or 21 or 22 or 23 or 24 or 25 or 26 or 27 (1114231)
- 47 30 or 31 or 32 or 33 or 34 or 35 or 36 or 37 or 38 or 39 or 40 or 41 or 42 or 43 or 44 or 45 (17513)
- 48 46 and 47 (1193)
- 49 remove duplicates from 48 (1150)

## Appendix 2: Methods used to investigate publication bias and outcome reporting bias in included systematic reviews

| Study ID<br>(Author, Year) | Type of bias<br>assessed* | Funnel plot | Begg's | Egger's | Trim and Fill | Fail-Safe-N | Reported<br>evidence of<br>publication bias | Cochrane (and<br>related) risk of<br>bias tool | Other approach |
|----------------------------|---------------------------|-------------|--------|---------|---------------|-------------|---------------------------------------------|------------------------------------------------|----------------|
| Abdalla G., 2015           | ORB                       |             |        |         |               |             |                                             | ✓                                              |                |
| Akl A., 2013               | ORB                       |             |        |         |               |             |                                             | ✓                                              |                |
| Algie C.M., 2015           | ORB                       |             |        |         |               |             |                                             | ✓                                              |                |
| Al-Muhandis N., 2011       | PB                        | ✓           |        |         |               |             |                                             |                                                |                |
| Aoyagi Y., 2015            | PB                        | ✓           |        | ✓       |               |             | ✓                                           |                                                |                |
| Arditi C., 2012            | PB and ORB                | ✓           |        |         |               |             | ✓                                           | ✓                                              |                |
| Aubin M., 2012             | ORB                       |             |        |         |               |             |                                             | ✓                                              |                |
| Badamgarav E., 2003        | PB                        | ✓           |        |         |               |             | ✓                                           |                                                |                |
| Baker R., 2015             | ORB                       |             |        |         |               |             |                                             | ✓                                              |                |
| Ballini L., 2015           | ORB                       |             |        |         |               |             |                                             | ✓                                              |                |
| Balogh R., 2016            | ORB                       |             |        |         |               |             |                                             | ✓                                              |                |
| Barnard S., 2015           | ORB                       |             |        |         |               |             |                                             | ✓                                              |                |

| Study ID<br>(Author, Year)  | Type of bias<br>assessed* | Funnel plot | Begg's | Egger's | Trim and Fill | Fail-Safe-N | Reported<br>evidence of<br>publication bias | Cochrane (and<br>related) risk of<br>bias tool | Other approach                                                                   |
|-----------------------------|---------------------------|-------------|--------|---------|---------------|-------------|---------------------------------------------|------------------------------------------------|----------------------------------------------------------------------------------|
| Baskerville N.B., 2012      | PB                        | ✓           | ✓      | ✓       |               |             | ✓                                           |                                                |                                                                                  |
| Berdot S., 2013             | PB                        | ✓           |        | ✓       |               |             |                                             |                                                |                                                                                  |
| Bos JM., 2016               | ORB                       |             |        |         |               |             |                                             | ✓                                              |                                                                                  |
| Bosch-Capblanch X.,<br>2011 | ORB                       |             |        |         |               |             |                                             | ✓                                              |                                                                                  |
| Bradford D.W., 2013         | PB                        |             |        |         |               |             |                                             |                                                | Searched ClinicalTrials.gov completed unpublished studies<br>and ongoing studies |
| Brasil PE., 2008            | PB                        | ✓           | ✓      | ✓       |               |             | ✓                                           |                                                |                                                                                  |
| Brocklehurst P., 2013       | ORB                       |             |        |         |               |             |                                             | ✓                                              |                                                                                  |
| Brown L., 2015              | PB and ORB                | ✓           |        |         |               |             |                                             | ✓                                              |                                                                                  |
| Butler M., 2011             | ORB                       |             |        |         |               |             |                                             | ✓                                              |                                                                                  |
| Campanella P., 2016         | PB                        | ✓           |        | ✓       |               |             |                                             |                                                |                                                                                  |
| Campbell F., 2016           | ORB                       |             |        |         |               |             |                                             | ✓                                              |                                                                                  |
| Cappuccio FP., 2004         | PB                        | ✓           |        | ✓       | ✓             |             | ✓                                           |                                                |                                                                                  |
| Chaillet N., 2007           | PB                        | ✓           | ✓      | ✓       |               |             |                                             |                                                |                                                                                  |

| Study ID<br>(Author, Year) | Type of bias<br>assessed* | Funnel plot | Begg's | Egger's | Trim and Fill | Fail-Safe-N | Reported<br>evidence of<br>publication bias | Cochrane (and<br>related) risk of<br>bias tool | Other approach |
|----------------------------|---------------------------|-------------|--------|---------|---------------|-------------|---------------------------------------------|------------------------------------------------|----------------|
| Chang C.W., 2015           | PB                        | ✓           |        | ✓       |               |             | ✓                                           |                                                |                |
| Chen C.C., 2016            | PB                        | ✓           |        |         |               |             |                                             |                                                |                |
| Chen Y., 2016              | PB                        | ✓           | ✓      | ✓       |               |             | ✓                                           |                                                |                |
| Chen Z., 2008              | PB                        | ✓           | ✓      | ✓       | ✓             |             | ✓                                           |                                                |                |
| Chodosh J., 2005           | PB                        | ✓           |        | ✓       |               |             | ✓                                           |                                                |                |
| Chodosh, 2005              | PB                        | ✓           | ✓      | ✓       |               |             | ✓                                           |                                                |                |
| Christensen, 2016          | PB and ORB                | ✓           |        |         |               |             |                                             | ✓                                              |                |
| Connock M., 2007           | PB                        | ✓           | ✓      | ✓       |               |             |                                             |                                                |                |
| Cook O., 2015              | ORB                       |             |        |         |               |             |                                             | ✓                                              |                |
| Corbett M, 2015            | ORB                       |             |        |         |               |             |                                             | ✓                                              |                |
| Costa-Font J., 2011        | PB                        | ✓           |        | ✓       |               |             | ✓                                           |                                                |                |
| Cui M., 2016               | ORB                       |             |        |         |               |             |                                             | ✓                                              |                |
| Cuijpers P., 2011          | PB                        | ✓           |        |         | ✓             |             |                                             |                                                |                |
| De Luca G., 2008           | PB                        | ✓           |        | ✓       |               |             |                                             |                                                |                |

| Study ID<br>(Author, Year) | Type of bias<br>assessed* | Funnel plot | Begg's | Egger's | Trim and Fill | Fail-Safe-N | Reported<br>evidence of<br>publication bias | Cochrane (and<br>related) risk of<br>bias tool | Other approach |
|----------------------------|---------------------------|-------------|--------|---------|---------------|-------------|---------------------------------------------|------------------------------------------------|----------------|
| de Lusignan S., 2014       | ORB                       |             |        |         |               |             |                                             | ✓                                              |                |
| de Roten Y., 2013          | PB                        | ✓           |        |         |               | ✓           | ✓                                           |                                                |                |
| Demonceau J., 2013         | PB and ORB                | ✓           |        | ✓       |               |             | ✓                                           | ✓                                              |                |
| Donald F., 2014            | ORB                       |             |        |         |               |             |                                             | ✓                                              |                |
| Dorresteijn JAN, 2010      | ORB                       |             |        |         |               |             |                                             | ✓                                              |                |
| Dudley L., 2011            | ORB                       |             |        |         |               |             |                                             | ✓                                              |                |
| Dyer TA., 2014             | ORB                       |             |        |         |               |             |                                             | ✓                                              |                |
| Easthall C., 2012          | PB                        | ✓           |        |         |               |             |                                             |                                                |                |
| Fiander M., 2015           | ORB                       |             |        |         |               |             |                                             | ✓                                              |                |
| Fisher E., 2015            | ORB                       |             |        |         |               |             |                                             | ✓                                              |                |
| Fletcher KE., 2011         | PB                        |             |        | ✓       |               |             |                                             |                                                |                |
| Flodgren G., 2010          | ORB                       |             |        |         |               |             |                                             | ✓                                              |                |
| Flodgren G., 2011          | ORB                       |             |        |         |               |             |                                             | ✓                                              |                |
| Flodgren G., 2011          | ORB                       |             |        |         |               |             |                                             | ✓                                              |                |

| Study ID<br>(Author, Year) | Type of bias<br>assessed* | Funnel plot | Begg's | Egger's | Trim and Fill | Fail-Safe-N | Reported<br>evidence of<br>publication bias | Cochrane (and<br>related) risk of<br>bias tool | Other approach                                                                                                                                                        |
|----------------------------|---------------------------|-------------|--------|---------|---------------|-------------|---------------------------------------------|------------------------------------------------|-----------------------------------------------------------------------------------------------------------------------------------------------------------------------|
| Flodgren G., 2013          | ORB                       |             |        |         |               |             |                                             | ✓                                              |                                                                                                                                                                       |
| Forsetlund L., 2009        | PB                        | ✓           |        |         |               |             | ✓                                           |                                                |                                                                                                                                                                       |
| Foy R., 2010               | PB                        | ✓           | ✓      | ✓       |               |             |                                             |                                                |                                                                                                                                                                       |
| Free C., 2013              | PB and ORB                | ✓           |        |         |               |             |                                             | ✓                                              |                                                                                                                                                                       |
| French SD., 2010           | ORB                       |             |        |         |               |             |                                             | ✓                                              |                                                                                                                                                                       |
| Gallagher RW., 2011        | PB and ORB                | ✓           |        |         | ✓             | ✓           |                                             | ✓                                              |                                                                                                                                                                       |
| Gardner MP., 2013          | PB and time<br>lag bias   | ✓           |        | ✓       |               |             | ✓                                           |                                                | Time lag bias assessed by comparing the time lag between<br>the end of the intervention period and the date of<br>publication (classified into ≤4 years and >4 years) |
| Gemmill M.C., 2007         | PB                        | ✓           |        |         |               |             | ✓                                           |                                                |                                                                                                                                                                       |
| Gensichen J., 2006         | PB                        | ✓           |        | ✓       |               |             | ✓                                           |                                                |                                                                                                                                                                       |
| Giguère A., 2012           | ORB                       |             |        |         |               |             |                                             | ✓                                              |                                                                                                                                                                       |
| Gillaizeau F., 2013        | ORB                       |             |        |         |               |             |                                             | ✓                                              |                                                                                                                                                                       |
| Gillies D., 2015           | ORB                       |             |        |         |               |             |                                             | ✓                                              |                                                                                                                                                                       |
| Göhler A., 2006            | PB                        | ✓           | ✓      | ✓       | ✓             |             | ✓                                           |                                                |                                                                                                                                                                       |



| Study ID<br>(Author, Year) | Type of bias<br>assessed* | Funnel plot | Begg's | Egger's | Trim and Fill | Fail-Safe-N | Reported<br>evidence of<br>publication bias | Cochrane (and<br>related) risk of<br>bias tool | Other approach |
|----------------------------|---------------------------|-------------|--------|---------|---------------|-------------|---------------------------------------------|------------------------------------------------|----------------|
| Goldzweig CL., 2015        | PB                        |             | ✓      | ✓       |               |             |                                             |                                                |                |
| Gooiker GA, 2010           | PB                        | ✓           |        | ✓       |               |             |                                             |                                                |                |
| Goossens-Laan CA.,<br>2011 | PB                        | ✓           |        | ✓       |               |             |                                             |                                                |                |
| Green CJ., 2010            | ORB                       |             |        |         |               |             |                                             | ✓                                              |                |
| Grobler L., 2015           | ORB                       |             |        |         |               |             |                                             | ✓                                              |                |
| Grochtdreis T., 2015       | ORB                       |             |        |         |               |             |                                             | ✓                                              |                |
| Gurusamy KS., 2014         | ORB                       |             |        |         |               |             |                                             | ✓                                              |                |
| Han H., 2009               | PB                        | ✓           |        |         |               | ✓           | ✓                                           |                                                |                |
| Hata T., 2016              | PB                        | ✓           |        | ✓       |               |             |                                             |                                                |                |
| Hayhurst KP., 2015         | PB                        | ✓           |        |         |               |             | ✓                                           |                                                |                |
| Higginson IJ., 2003        | PB                        | ✓           |        |         |               |             | ✓                                           |                                                |                |
| Hodgkinson B., 2011        | ORB                       |             |        |         |               |             |                                             | ✓                                              |                |
| Horsley T., 2011           | ORB                       |             |        |         |               |             |                                             | ✓                                              |                |

| Study ID<br>(Author, Year) | Type of bias<br>assessed* | Funnel plot | Begg's | Egger's | Trim and Fill | Fail-Safe-N | Reported<br>evidence of<br>publication bias | Cochrane (and<br>related) risk of<br>bias tool | Other approach |
|----------------------------|---------------------------|-------------|--------|---------|---------------|-------------|---------------------------------------------|------------------------------------------------|----------------|
| Ivers N., 2012             | ORB                       |             |        |         |               |             |                                             | ✓                                              |                |
| Jacobson VJC., 2005        | PB                        | ✓           |        |         |               |             |                                             |                                                |                |
| Jamal MH., 2012            | PB                        | ✓           |        | ✓       |               |             | ✓                                           |                                                |                |
| Jia L., 2014               | ORB                       |             |        |         |               |             |                                             | ✓                                              |                |
| Kahn SR., 2013             | PB and ORB                | ✓           |        |         |               |             | ✓                                           | ✓                                              |                |
| Karmali KN., 2014          | ORB                       |             |        |         |               |             |                                             | ✓                                              |                |
| Keebler JR., 2016          | PB                        | ✓           |        | ✓       |               |             | ✓                                           |                                                |                |
| Kelley JM., 2014           | PB and ORB                | ✓           | ✓      |         | ✓             | ✓           |                                             | ✓                                              |                |
| Kerlin MP., 2017           | PB and ORB                | ✓           |        | ✓       |               |             |                                             | ✓                                              | Macaskill test |
| Ketelaar NABM., 2011       | ORB                       |             |        |         |               |             |                                             | ✓                                              |                |
| Khangura JK., 2012         | ORB                       |             |        |         |               |             |                                             | ✓                                              |                |
| Khunpradit S., 2011        | ORB                       |             |        |         |               |             |                                             | ✓                                              |                |
| Kilpatrick K., 2015        | ORB                       |             |        |         |               |             |                                             | ✓                                              |                |
| Kim YL., 2005              | PB                        | ✓           |        |         |               | ✓           |                                             |                                                |                |

| Study ID<br>(Author, Year) | Type of bias<br>assessed* | Funnel plot | Begg's | Egger's | Trim and Fill | Fail-Safe-N | Reported<br>evidence of<br>publication bias | Cochrane (and<br>related) risk of<br>bias tool | Other approach                                                                                                                                                                                     |
|----------------------------|---------------------------|-------------|--------|---------|---------------|-------------|---------------------------------------------|------------------------------------------------|----------------------------------------------------------------------------------------------------------------------------------------------------------------------------------------------------|
| Kroon FP., 2014            | PB and ORB                | ✓           |        |         |               |             |                                             | ✓                                              |                                                                                                                                                                                                    |
| Lambrinou E., 2012         | PB                        | ✓           |        | ✓       |               |             | ✓                                           |                                                |                                                                                                                                                                                                    |
| Lau D., 2012               | PB                        | ✓           |        |         |               |             |                                             |                                                | Harbord's test                                                                                                                                                                                     |
| Laver KE., 2013            | ORB                       |             |        |         |               |             |                                             | ✓                                              |                                                                                                                                                                                                    |
| Lin H., 2014               | PB and ORB                | ✓           | ✓      |         |               |             |                                             | ✓                                              |                                                                                                                                                                                                    |
| Lu Z., 2012                | PB and ORB                | ✓           |        | ✓       |               |             | ✓                                           |                                                | Peter's Method<br>To assess the risk of possible outcome reporting bias,<br>reviewers included studies that met the inclusion criteria<br>but did not provide sufficient data on relevant outcomes |
| Luiza VL., 2015            | ORB                       |             |        |         |               |             |                                             | ✓                                              |                                                                                                                                                                                                    |
| Lutge EE., 2015            | ORB                       |             |        |         |               |             |                                             | ✓                                              |                                                                                                                                                                                                    |
| Lv L., 2012                | ORB                       |             |        |         |               |             |                                             | ✓                                              |                                                                                                                                                                                                    |
| Ma N., 2017                | PB                        | ✓           |        |         |               |             |                                             |                                                |                                                                                                                                                                                                    |
| Maaskant JM., 2015         | ORB                       |             |        |         |               |             |                                             | ✓                                              |                                                                                                                                                                                                    |
| McBain H., 2016            | ORB                       |             |        |         |               |             |                                             | ✓                                              |                                                                                                                                                                                                    |

| Study ID<br>(Author, Year)  | Type of bias<br>assessed* | Funnel plot | Begg's | Egger's | Trim and Fill | Fail-Safe-N | Reported<br>evidence of<br>publication bias | Cochrane (and<br>related) risk of<br>bias tool | Other approach |
|-----------------------------|---------------------------|-------------|--------|---------|---------------|-------------|---------------------------------------------|------------------------------------------------|----------------|
| McGowan JL., 2009           | ORB                       |             |        |         |               |             |                                             | ✓                                              |                |
| Ming WK., 2016              | ORB                       |             |        |         |               |             |                                             | ✓                                              |                |
| Mitchell GK., 2015          | ORB                       |             |        |         |               |             |                                             | ✓                                              |                |
| Moja L., 2014               | PB and ORB                | ✓           | ✓      | ✓       |               |             |                                             | ✓                                              |                |
| Murphy SM., 2015            | ORB                       |             |        |         |               |             |                                             | ✓                                              |                |
| Murthy L., 2012             | ORB                       |             |        |         |               |             |                                             | ✓                                              |                |
| Neumeyer-Gromen A.,<br>2004 | PB                        | ✓           | ✓      | ✓       |               |             |                                             |                                                |                |
| Nglazi MD., 2013            | ORB                       |             |        |         |               |             |                                             | ✓                                              |                |
| Nieuwlaat R., 2014          | ORB                       |             |        |         |               |             |                                             | ✓                                              |                |
| Oliver D., 2000             | PB                        |             | ✓      |         |               |             |                                             |                                                |                |
| Opiyo N., 2015              | ORB                       |             |        |         |               |             |                                             | ✓                                              |                |
| Opiyo N., 2016              | ORB                       |             |        |         |               |             |                                             | ✓                                              |                |
| O'Sullivan JW., 2016        | ORB                       |             |        |         |               |             |                                             | ✓                                              |                |

| Study ID<br>(Author, Year)       | Type of bias<br>assessed* | Funnel plot | Begg's | Egger's | Trim and Fill | Fail-Safe-N | Reported<br>evidence of<br>publication bias | Cochrane (and<br>related) risk of<br>bias tool | Other approach |
|----------------------------------|---------------------------|-------------|--------|---------|---------------|-------------|---------------------------------------------|------------------------------------------------|----------------|
| Panagioti M., 2014               | PB                        | ✓           | ✓      |         |               |             | ✓                                           |                                                |                |
| Pande S., 2013                   | ORB                       |             |        |         |               |             |                                             | ✓                                              |                |
| Parmelli E., 2012                | ORB                       |             |        |         |               |             |                                             | ✓                                              |                |
| Peñaloza B., 2011                | ORB                       |             |        |         |               |             |                                             | ✓                                              |                |
| Perrier L., 2011                 | ORB                       |             |        |         |               |             |                                             | ✓                                              |                |
| Peterson AM., 2003               | PB                        | ✓           |        |         |               |             | ✓                                           |                                                |                |
| Peytremann-Bridevaux<br>I., 2015 | PB and ORB                | ✓           |        |         |               |             |                                             | ✓                                              |                |
| Rachoin JS., 2012                | PB                        |             |        | ✓       | ✓             |             |                                             |                                                |                |
| Rashidian A., 2015               | ORB                       |             |        |         |               |             |                                             | ✓                                              |                |
| Reeves S., 2013                  | ORB                       |             |        |         |               |             |                                             | ✓                                              |                |
| Robotham D., 2016                | PB                        | ✓           |        | ✓       | ✓             |             |                                             |                                                |                |
| Rockers P., 2013                 | ORB                       |             |        |         |               |             |                                             | ✓                                              |                |
| Ross MKM, 2012                   | PB                        | ✓           |        |         | ✓             | ✓           |                                             |                                                |                |

| Study ID<br>(Author, Year) | Type of bias<br>assessed* | Funnel plot | Begg's | Egger's | Trim and Fill | Fail-Safe-N | Reported<br>evidence of<br>publication bias | Cochrane (and<br>related) risk of<br>bias tool | Other approach                                                                                                                                                                                                                                                                                                                                                                         |
|----------------------------|---------------------------|-------------|--------|---------|---------------|-------------|---------------------------------------------|------------------------------------------------|----------------------------------------------------------------------------------------------------------------------------------------------------------------------------------------------------------------------------------------------------------------------------------------------------------------------------------------------------------------------------------------|
| Rotter T., 2010            | PB and ORB                | ✓           |        |         |               |             |                                             | ✓                                              |                                                                                                                                                                                                                                                                                                                                                                                        |
| Rubio-Valera, M            | PB                        | ✓           |        | ✓       |               |             |                                             |                                                |                                                                                                                                                                                                                                                                                                                                                                                        |
| Ruotsalainen JH., 2015     | PB and ORB                | ✓           |        |         |               |             | ✓                                           | ✓                                              |                                                                                                                                                                                                                                                                                                                                                                                        |
| Ruppar TM., 2016           | PB                        | ✓           |        |         |               |             |                                             |                                                | Conducted moderator analyses to evaluate whether effect estimates were different based on factors such as year of publication, publication method (eg, journal article, dissertation) among other factors                                                                                                                                                                              |
| Saffari M., 2014           | PB and ORB                | ✓           | ✓      | ✓       |               |             | ✓                                           | ✓                                              |                                                                                                                                                                                                                                                                                                                                                                                        |
| Salyers MP., 2016          | PB                        | ✓           |        | ✓       |               |             |                                             |                                                |                                                                                                                                                                                                                                                                                                                                                                                        |
| Santo K., 2016             | PB and ORB                | ✓           |        | ✓       | ✓             |             | ✓                                           | ✓                                              |                                                                                                                                                                                                                                                                                                                                                                                        |
| Scott A., 2011             | ORB                       |             |        |         |               |             |                                             | ✓                                              |                                                                                                                                                                                                                                                                                                                                                                                        |
| Shamliyan TA., 2008        | PB                        |             |        | ✓       | ✓             |             |                                             |                                                | Peter's Method                                                                                                                                                                                                                                                                                                                                                                         |
| Shen Y., 2007              | PB                        | ✓           |        |         |               |             |                                             |                                                | Assessed publication bias by examining the relationship between the square root of degrees of freedom and the absolute value of t-statistics. They also ran a difference-in-difference regression using the absolute t-statistics as the dependent variables and square root of degrees of freedom, ownership-focus indicator, and their interaction term as the independent variables |

| Study ID<br>(Author, Year)                    | Type of bias<br>assessed* | Funnel plot | Begg's | Egger's | Trim and Fill | Fail-Safe-N | Reported<br>evidence of<br>publication bias | Cochrane (and<br>related) risk of<br>bias tool | Other approach                                                                                                                                                                                                                                                                                                                                                   |
|-----------------------------------------------|---------------------------|-------------|--------|---------|---------------|-------------|---------------------------------------------|------------------------------------------------|------------------------------------------------------------------------------------------------------------------------------------------------------------------------------------------------------------------------------------------------------------------------------------------------------------------------------------------------------------------|
| Shepperd S., 2016                             | PB and ORB                | ✓           |        |         |               |             |                                             | ✓                                              |                                                                                                                                                                                                                                                                                                                                                                  |
| Shepperd S., 2016                             | ORB                       |             |        |         |               |             |                                             | ✓                                              |                                                                                                                                                                                                                                                                                                                                                                  |
| Shojania KG., 2006                            | PB                        | ✓           |        |         |               |             | ✓                                           |                                                | Univariate analysis of sample size and effect size                                                                                                                                                                                                                                                                                                               |
| Singh S., 2014                                | PB                        | ✓           |        | ✓       | ✓             |             | ✓                                           |                                                |                                                                                                                                                                                                                                                                                                                                                                  |
| Smith SM., 2016                               | ORB                       |             |        |         |               |             |                                             | ✓                                              |                                                                                                                                                                                                                                                                                                                                                                  |
| Stacey D., 2014                               | PB and ORB                | ✓           |        |         |               |             |                                             | ✓                                              |                                                                                                                                                                                                                                                                                                                                                                  |
| Stephens M., 2015                             | ORB                       |             |        |         |               |             |                                             | ✓                                              |                                                                                                                                                                                                                                                                                                                                                                  |
| Stroke Unit Trialists'<br>Collaboration, 1997 | PB                        | ✓           |        |         |               |             |                                             |                                                | Assessed publication bias by calculating how many<br>randomised patients (with a similar baseline event rate as<br>in the review) would have to be recruited from neutral<br>trials (odds ratio=1.0) to render the overall result non-<br>significant to estimate the degree to which conclusions of<br>the review would be overturned by missing neutral trials |
| Suphanchaimat R., 2016                        | PB                        | ✓           |        | ✓       |               |             | ✓                                           |                                                |                                                                                                                                                                                                                                                                                                                                                                  |
| Teding van Berkhout E.,<br>2016               | PB                        | ✓           |        |         | ✓             | ✓           | ✓                                           |                                                |                                                                                                                                                                                                                                                                                                                                                                  |
| Thakkar J., 2016                              | PB                        | ✓           |        | ✓       | ✓             |             | ✓                                           |                                                |                                                                                                                                                                                                                                                                                                                                                                  |

| Study ID<br>(Author, Year)  | Type of bias<br>assessed* | Funnel plot | Begg's | Egger's | Trim and Fill | Fail-Safe-N | Reported<br>evidence of<br>publication bias | Cochrane (and<br>related) risk of<br>bias tool | Other approach |
|-----------------------------|---------------------------|-------------|--------|---------|---------------|-------------|---------------------------------------------|------------------------------------------------|----------------|
| Thompson Coon J., 2012      | ORB                       |             |        |         |               |             |                                             | ✓                                              |                |
| Thompson RL., 2003          | PB                        | ✓           |        |         |               |             | ✓                                           |                                                |                |
| Toma T., 2014               | PB and ORB                | ✓           |        | ✓       |               |             | ✓                                           | ✓                                              |                |
| Tongsai S., 2012            | PB                        | ✓           | ✓      | ✓       | ✓             |             |                                             |                                                |                |
| Tricco AC., 2012            | ORB                       |             |        |         |               |             |                                             | ✓                                              |                |
| Tsai AC., 2005              | PB                        | ✓           |        | ✓       |               |             | ✓                                           |                                                |                |
| Tura G., 2013               | PB                        | ✓           | ✓      | ✓       | ✓             |             | ✓                                           |                                                |                |
| Tyson MD., 2016             | PB                        | ✓           | ✓      |         |               |             | ✓                                           |                                                |                |
| Tzortziou Brown V.,<br>2016 | ORB                       |             |        |         |               |             |                                             | ✓                                              |                |
| Urquhart C., 2009           | ORB                       |             |        |         |               |             |                                             | ✓                                              |                |
| van Driel ML., 2016         | ORB                       |             |        |         |               |             |                                             | ✓                                              |                |
| van Ginneken N., 2013       | ORB                       |             |        |         |               |             |                                             | ✓                                              |                |
| van Straten A., 2009        | PB                        | ✓           |        |         | ✓             |             | ✓                                           |                                                |                |



| Study ID<br>(Author, Year)  | Type of bias<br>assessed* | Funnel plot | Begg's | Egger's | Trim and Fill | Fail-Safe-N | Reported<br>evidence of<br>publication bias | Cochrane (and<br>related) risk of<br>bias tool | Other approach |
|-----------------------------|---------------------------|-------------|--------|---------|---------------|-------------|---------------------------------------------|------------------------------------------------|----------------|
| Vasilevska M., 2014         | PB                        | ✓           |        | ✓       |               |             | ✓                                           |                                                |                |
| Vaughan KS., 2013           | ORB                       |             |        |         |               |             |                                             | ✓                                              |                |
| Vernon SW., 2010            | PB                        | ✓           | ✓      | ✓       |               |             |                                             |                                                |                |
| Virk SA., 2016              | PB                        | ✓           | ✓      | ✓       | ✓             |             |                                             |                                                |                |
| Von Meyenfeldt EM.,<br>2012 | PB                        |             |        | ✓       |               |             |                                             |                                                |                |
| Walsh CM., 2012             | ORB                       |             |        |         |               |             |                                             | ✓                                              |                |
| Warsi A., 2004              | PB                        | ✓           |        |         |               |             | ✓                                           |                                                |                |
| Watson SJ., 2016            | ORB                       |             |        |         |               |             |                                             | ✓                                              |                |
| Weeks G., 2016              | PB and ORB                | ✓           |        |         |               |             | ✓                                           | ✓                                              |                |
| Wei I., 2011                | ORB                       |             |        |         |               |             |                                             | ✓                                              |                |
| Weller CD., 2016            | ORB                       |             |        |         |               |             |                                             | ✓                                              |                |
| Witter S., 2012             | ORB                       |             |        |         |               |             |                                             | ✓                                              |                |
| Wootton R., 2012            | PB                        | ✓           |        |         |               |             | ✓                                           |                                                |                |

| Study ID<br>(Author, Year) | Type of bias<br>assessed* | Funnel plot | Begg's | Egger's | Trim and Fill | Fail-Safe-N | Reported<br>evidence of<br>publication bias | Cochrane (and<br>related) risk of<br>bias tool | Other approach |
|----------------------------|---------------------------|-------------|--------|---------|---------------|-------------|---------------------------------------------|------------------------------------------------|----------------|
| Zhai YK., 2014             | PB and ORB                | ✓           |        | ✓       | ✓             |             | ✓                                           | ✓                                              |                |
| Zhao FF., 2017             | PB and ORB                | ✓           | ✓      | ✓       |               |             |                                             | ✓                                              |                |
| Zhou S., 2016              | ORB                       |             |        |         |               |             |                                             | ✓                                              |                |

\*ORB: Outcome Reporting Bias and PB: Publication bias
